# Supplementary material for: Mechanistically Distinct Mouse Models for CRX-Associated Retinopathy
Source: PLoS Genet. 2014 Feb 6;10(2):e1004111. doi: 10.1371/journal.pgen.1004111 (PMC3916252; doi:10.1371/journal.pgen.1004111)
Supplement: Table S5 — qRT-PCR Expression in P10 mouse retinas. ∧Overall p-value for each primer set was tested in heterozygous and homozygous mice; p<0.09 was considered marginally significant. For all comparisons to WT: *p<0.05; reference genes Tuba1b and Ubb. (XLSX) [file pgen.1004111.s010.xlsx]

## Sheet: Sheet1
Table S5. qRT-PCR Expression in P10 mouse retinas
		Fold change to WT						Fold change to WT
Gene	^Overall p-value (heterozygous mice)	E168d2/+	E168d2neo/+	R90W/+	R90Wneo/+	+/-	^Overall p-value (homozygous mice)	E168d2/d2	E168d2neo/d2neo	R90W/W	R90Wneo/Wneo	-/-
Rho	0.011	0.19*	0.27*	1.00	0.38*	0.45*	0.003	4.4e-04*	6.1e-03*	0.26*	0.03*	0.01*
Arr3	0.017	0.06*	0.20*	0.78	0.97	1.2	0.004	5.0e-04*	3.1e-03*	0.06*	0.10*	0.06*
Opn1sw	0.017	0.06*	0.13*	0.35	0.42	0.62	0.082	0.04*	0.04*	0.05	0.12	0.03
Opn1mw	0.008	0.03*	0.07*	0.35	.20*	0.17*	0.047	7.2e-03*	4.8e-03*	7.2e-3*	0.01*	2e-03*
Dnaic1	0.042	0.26	0.27*	0.34*	0.69	0.9	0.016	0.48*	0.66*	0.22*	0.7*	0.65
Myo7a	0.293	0.36	0.46	0.47	0.6	0.74	0.028	0.43	0.32*	0.37*	0.78*	0.27*
Crx	0.0008	1.66*	1.03	1.18	0.93	0.8	0.0003	2.06*	1.46*	0.97	0.68*	0.00*
Otx2	0.067	0.72	0.99	1.24	1.18*	1.62*	0.118	1.49	1.39	1.32	1.7	1.54
Crxos1	0.247	0.62	0.84	0.76	0.58	1.12	0.010	0.36*	0.4*	0.62	0.62*	0.42*
Nrl	0.056	1.11	1.43	1.97*	1.36	0.81	0.108	0.52	0.54	0.64	0.5	0.47
Nr2e3	0.107	1.25	1.49	1.17	1.27	1.16	0.695	1.17	1.10	1.15	1.13	0.44*
Rxry	0.008	2.4*	1.68*	1.14	1.70*	1.01	0.046	11.10*	6.55*	6.92*	7.69*	5.8*
Thrb	0.027	0.7	0.76*	1.15*	0.94	1.09	0.166	0.7	0.76	0.78	1.08	0.92
Pias3	0.060	0.52	0.54	0.61	0.73	0.96	0.228	0.71	0.46	0.68	0.66	0.37
^Overall p-value for each primer set was tested in heterozygous and homozygous mice; p<0.09 was considered marginally significant
*p<0.05; reference genes Tuba1b and Ubb
